# Supplementary material
Source: Copernicus journal article supplement (doi:10.5194/egqsj-11-121-1960)

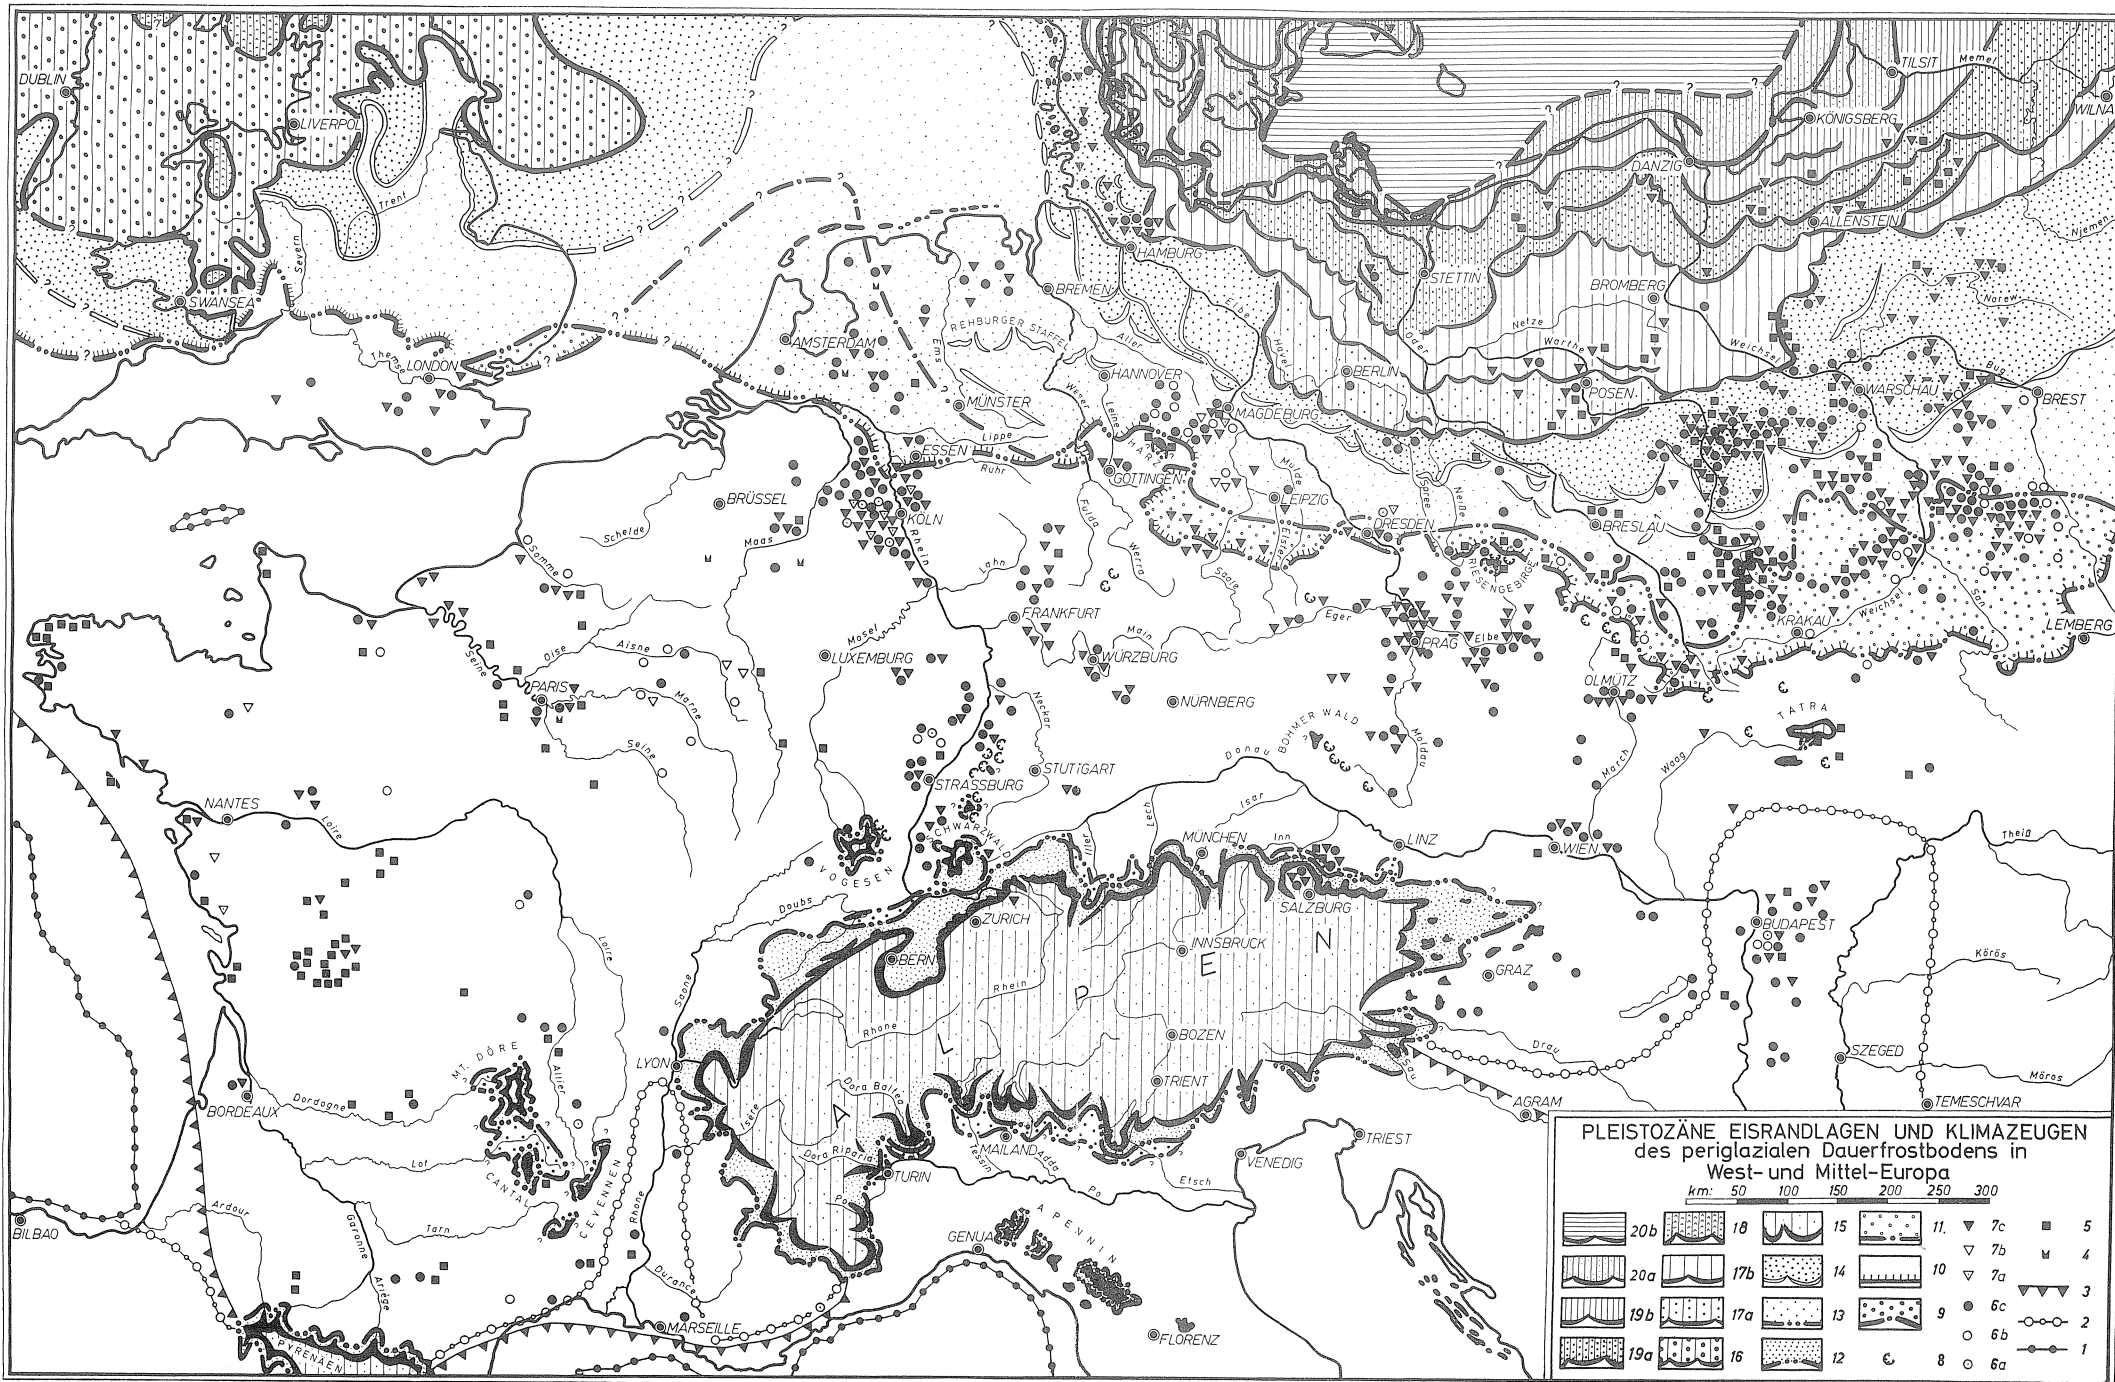

Supplement: Supplementary file 1 [file egqsj-11-121-1960-supplement.pdf]
